# Supplementary material for: Microbial community diversity patterns are related to physical and chemical differences among temperate lakes near Beaver Island, MI
Source: PubMed Central journal article supplement (PMC5647861; doi:10.7717/peerj.3937), 2017-10-16

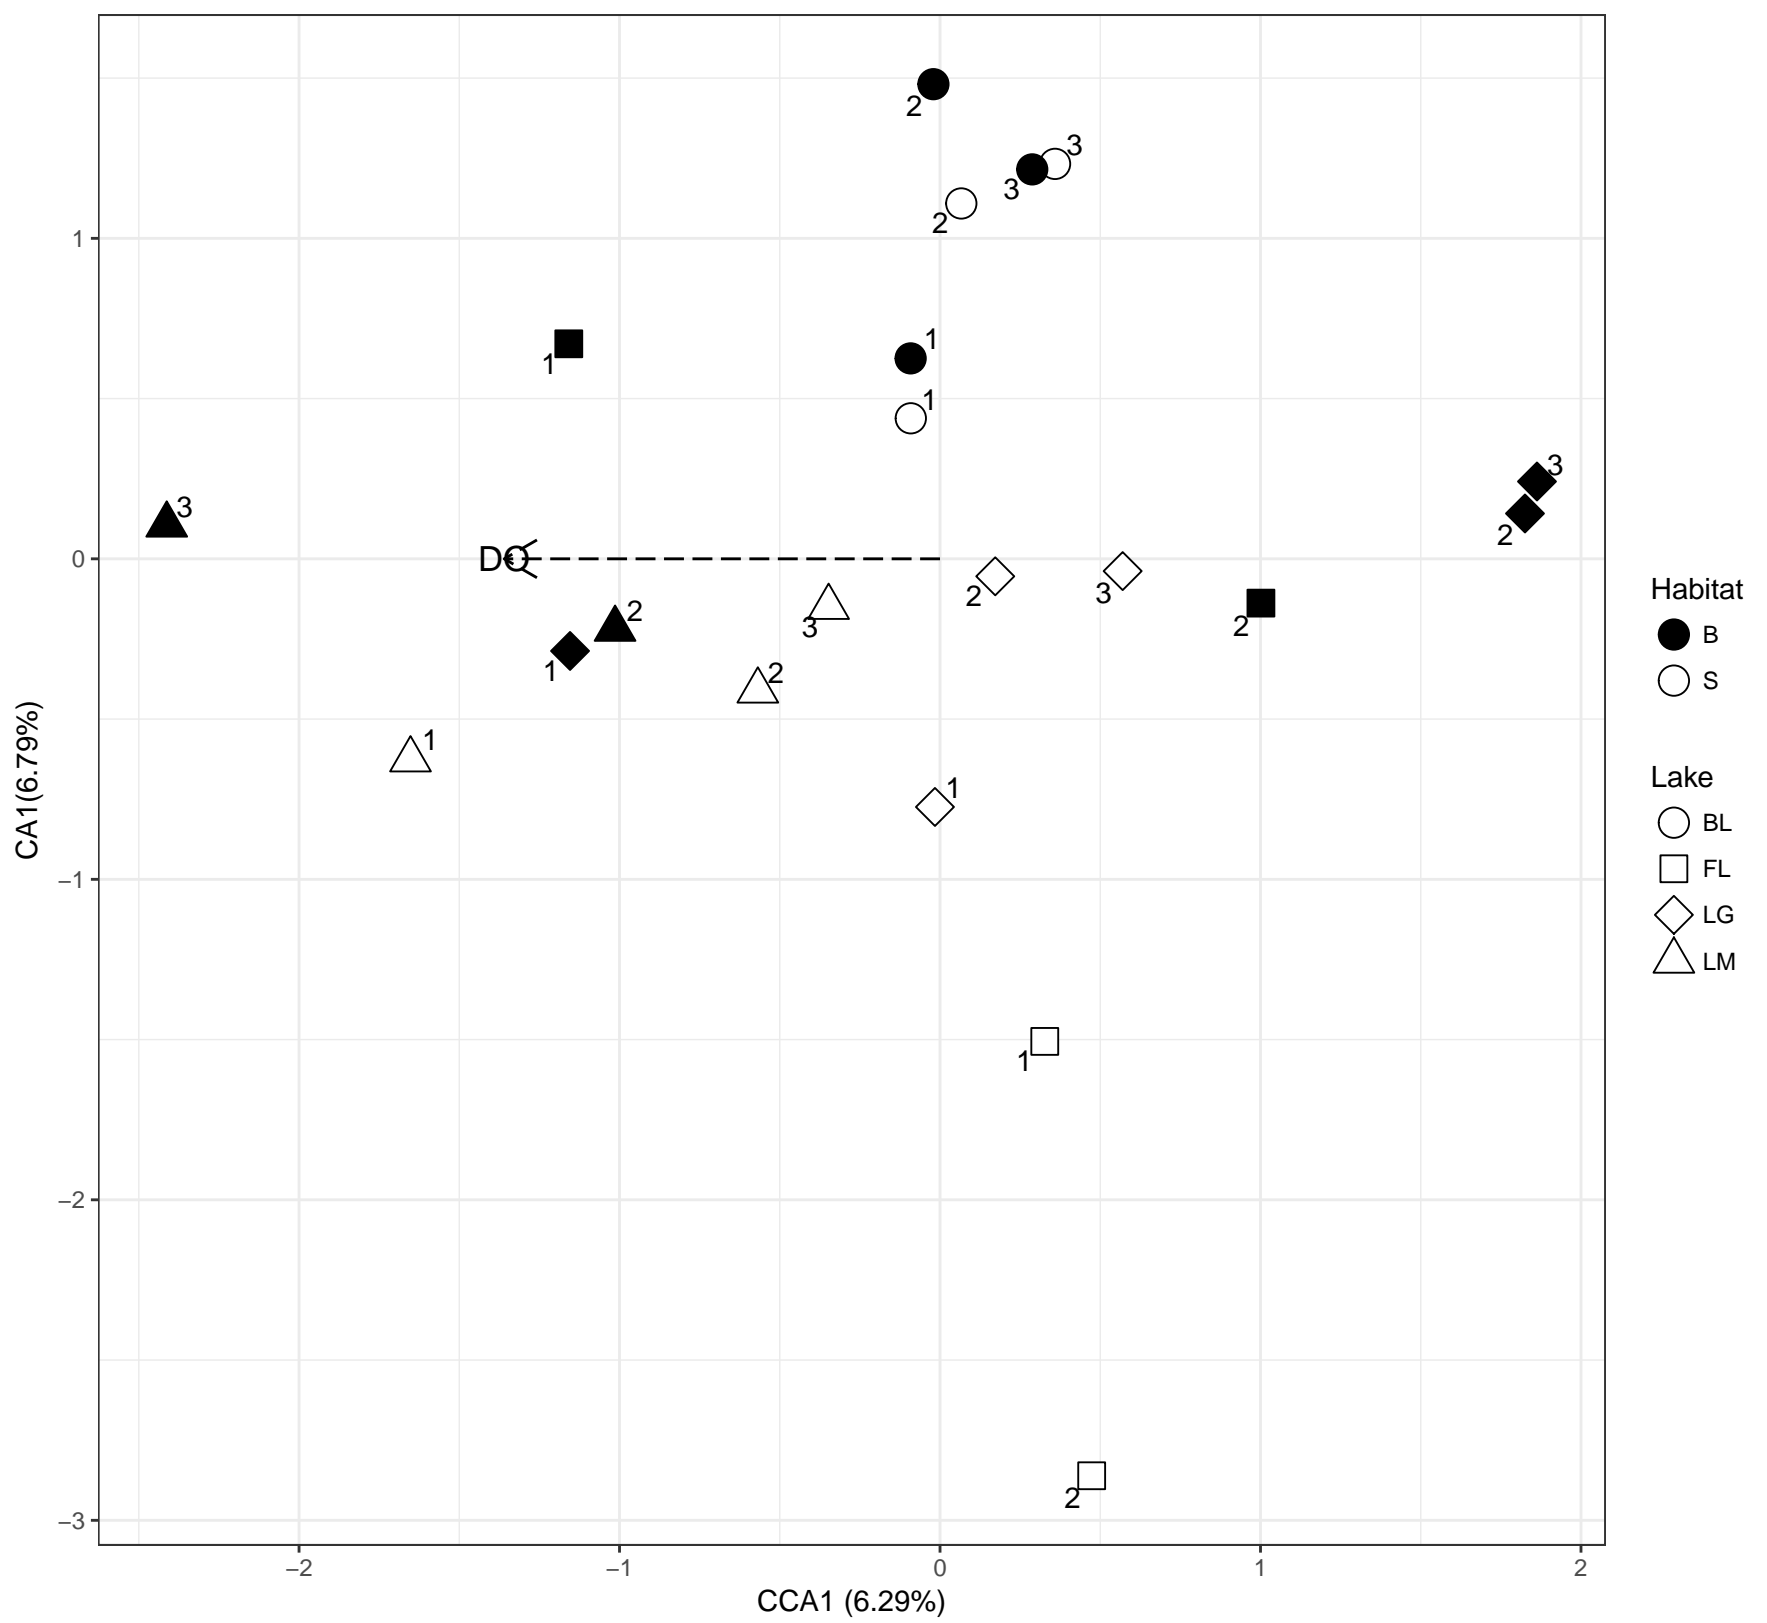

Supplement: peerj-05-3937-s002.pdf [file peerj-05-3937-s002.pdf]
