# Supplementary material for: Microbial community diversity patterns are related to physical and chemical differences among temperate lakes near Beaver Island, MI
Source: PeerJ. 2017 Oct 16;5:e3937. doi: 10.7717/peerj.3937 (PMC5647861; doi:10.7717/peerj.3937)
Supplement: Table S3 [file peerj-05-3937-s005.xlsx]

## Sheet: Sheet1
Supplementary Table 3. Metadata associated with environmental samples analyzed within this study.
Sample ID	Lake	Date	Habitat	PCR cycles
BI_1	LG	2014-06-10	Surface	40
BI_2	LG	2014-06-10	Bottom	36
BI_3	LM	2014-06-10	Surface	40
BI_5	BL	2014-06-11	Surface	40
BI_6	BL	2014-06-11	Bottom	36
BI_7	FL	2014-06-11	Surface	40
BI_8	FL	2014-06-11	Bottom	36
BI_9	LG	2014-07-28	Surface	40
BI_10	LG	2014-07-28	Bottom	36
BI_11	LM	2014-07-30	Surface	40
BI_12	LM	2014-07-30	Bottom	36
BI_13	BL	2014-07-28	Surface	36
BI_14	BL	2014-07-28	Bottom	36
BI_15	FL	2014-07-29	Surface	36
BI_16	FL	2014-07-29	Bottom	40
BI_17	LG	2014-08-31	Surface	36
BI_18	LG	2014-08-31	Bottom	36
BI_19	LM	2014-08-30	Surface	40
BI_20	LM	2014-08-30	Bottom	40
BI_21	BL	2014-08-31	Surface	40
BI_22	BL	2014-08-31	Bottom	40
BI_23	FL	2014-08-30	Surface	40
BI_24	FL	2014-08-30	Bottom	40
